# Supplementary material
Source: publisher figshare collection journal article supplement (https://diabetesjournals.figshare.com/ndownloader/files/24383555)
Supplement: Supplementary file 1 [file 24383555]

## Sheet: Supplemental Table 1
Supplemental Table 1. Islet Donor Profiles
Figure 2 & 3
#	Receipt Date	Sex	Age (years)	Race	BMI	Cause of death
1	2018-11-01	M	44	White	40	Stroke
2	2019-02-01	M	25	Hispanic/Latino	27.7	Anoxia
3	2019-05-01	M	57	Hispanic/Latino	25.8	Stroke
4	2019-05-19	M	48	White	38.8	Stroke
5	2019-03-01	F	56	N/A	39.5	Stroke
6	2019-03-01	F	57	Black/African American	29.2	Stroke
7	2019-08-19	F	40	White	30.4	Stroke
8	2019-08-19	F	57	White	32.9	Stroke
Figure 4
#	Receipt Date	Sex	Age (years)	Race	BMI	Cause of death
1	2018-11-01	M	44	White	40	Stroke
2	2018-11-01	M	58	N/A	32.4	Head trauma
3	2019-02-01	M	25	Hispanic/Latino	27.7	Anoxia
4	2019-04-01	M	51	Hispanic/Latino	26.7	Anoxia
5	2010-11-10	F	48	White	28	Stroke
6	2011-01-01	F	55	Hispanic/Latino	31	Stroke
7	2019-05-01	F	53	White	39.95	Stroke
8	2020-01-20	F	50	White	39.2	Stroke

## Sheet: Supplemental Table 2
Supplemental Table 2. Mass-to-charge (m/z) Transitions Used for the Quantification of Androgens and Estrogen
Steroid	m/z transitions Quantifier
	Qualifier
Analytes
Testosterone	289.1 > 96.9
	289.1 > 109.0
Dihydrotestosterone (DHT)	291.3 > 255.1
	291.1 > 159.0
Androstenedione	287.1 > 96.9
	287.1 > 108.9
5α-dione	289.2 > 271.1
	289.2 > 253.1
Androsterone	291.1 > 255.1
	291.1 > 273.1
Estradiol	271.4 > 145.0
	271.4 > 183.0
Internal standards
Testosterone-D3	292.1 > 96.9
DHT-D3	294.1 > 258.1
Oestradiol-13C3	274.4 > 148.0
